# Supplementary material for: In and out: Leishmania metastasis by hijacking lymphatic system and migrating immune cells
Source: Frontiers journal article supplement (doi:10.3389/fcimb.2022.941860), 2022-08-12
Supplement: Data_Sheet_2.PDF [file Data_Sheet_2.PDF]

**Table S1. Antibodies, dyes and beads used in this study**

| <b>Target</b>             | <b>Clone name</b> | <b>Coupling</b>             | <b>Dilution</b> | <b>Brand</b> | <b>Lot</b> | <b>Reference</b> | <b>Methods</b>                                 |
|---------------------------|-------------------|-----------------------------|-----------------|--------------|------------|------------------|------------------------------------------------|
| Anti-mouse Ly6C           | HK1.4             | FITC                        | 1:300           | BioLegend    | B195146    | Cat. #128006     | Flow cytometry and Immunofluorescence analysis |
| Anti-mouse/human CD11b    | M1/70             | PE-Cyanine 5                | 1:1000          | BioLegend    | B178549    | Cat: #101210     | Flow cytometry and Immunofluorescence analysis |
| Anti-mouse F4/80          | BM8               | APC-Cyanine7                | 1:100           | BioLegend    | B324923    | Cat: #123118     | Flow cytometry and Immunofluorescence analysis |
| Anti-mouse CD45.2         | 104               | Brilliant Violet 510        | 1:500           | BioLegend    | B251593    | Cat. #109837     | Flow cytometry and Immunofluorescence analysis |
| Anti-mouse CD192 (CCR2)   | SA203G11          | Alexa fluor 647             | 1:100           | BioLegend    | B239629    | Cat. #150604     | Flow cytometry and Immunofluorescence analysis |
| Anti-mouse CD206 (MMR)    | C068C2            | Biotin                      | 1:200           | BioLegend    | B275399    | Cat. #141714     | Flow cytometry and Immunofluorescence analysis |
| Anti-Biotin               | -                 | Streptavidin in PE-Cyanine7 | 1:200           | BioLegend    | B345298    | Cat. #405206     | Flow cytometry and Immunofluorescence analysis |
| Anti-mouse CD19           | 1D3/CD19          | FITC                        | 1:500           | BioLegend    | B243569    | Cat. #152404     | Flow cytometry and Immunofluorescence analysis |
| Anti-mouse CD3            | 17A2              | Brilliant violet 510        | 1:200           | BioLegend    | B170040    | Cat. #100233     | Flow cytometry and Immunofluorescence analysis |
| Anti-mouse CD11c          | N418              | APC                         | 1:500           | BioLegend    | B262130    | Cat. #117310     | Flow cytometry and Immunofluorescence analysis |
| Anti-mouse I-A/I-E        | M5/114.15.2       | Brilliant violet 510        | 1:1000          | BioLegend    | B172398    | Cat. #107635     | Flow cytometry and Immunofluorescence analysis |
| Anti-mouse NK-1.1 (CD161) | PK136             | PE                          | 1:200           | BioLegend    | B134095    | Cat. #108708     | Flow cytometry and Immunofluorescence analysis |
| Anti-mouse Ly6G           | 1A8               | APC/Cy7                     | 1:700           | BioLegend    | B238265    | Cat. #127624     | Flow cytometry and Immunofluorescence analysis |
| Anti-mouse/human CD11b    | M1/70             | Brilliant Violet 421        | 1:600           | BioLegend    | B227047    | Cat. #101235     | Flow cytometry and Immunofluorescence analysis |
| Anti-mouse CD206 (MMR)    | C068C2            | Brilliant violet 650        | 1:500           | BioLegend    | B229790    | Cat. #141723     | Flow cytometry and Immunofluorescence analysis |
| Anti-Biotin               | -                 | Streptavidin in PerCP       | 1:500           | BioLegend    | B214631    | Cat. #405213     | Flow cytometry and Immunofluorescence analysis |

| Target                                               | Clone name                        | Coupling                          | Dilution             | Brand                       | Lot         | Reference        | Methods                                        |
|------------------------------------------------------|-----------------------------------|-----------------------------------|----------------------|-----------------------------|-------------|------------------|------------------------------------------------|
| Zombie Aqua Fixable Viability Kit                    | Stains eukaryotic cells           | Emission range-512/526nm          | 1:1000               | BioLegend                   | B226206     | Cat: #423102     | Flow cytometry.                                |
| Aqua fluorescent reactive dye*for 405 nm excitation* | Stains eukaryotic cells           | Emission range-367/526            | 1:250                | Invitrogen Molecular probes | 430671      | Cat: #L34957     | Flow cytometry                                 |
| Anti-mouse Ly6G (Gr-1)                               | 1A8-Ly6G                          | PE                                | 1:600                | eBioscience                 | 4284862     | Cat #12-9668-82  | Flow cytometry                                 |
| Anti-mouse CD45                                      | 30-F11                            | PE-Cyanine 7                      | 1:200                | eBioscience                 | 4277984     | Cat #25-0451-82  | Flow cytometry                                 |
| Anti-mouse CD11c                                     | N418                              | efluor 660                        | 1:500                | eBioscience                 | E15733-102  | Cat #50-0114-82  | Flow cytometry                                 |
| Anti-mouse CD3e                                      | 145-2C11                          | PE-Cyanine 5                      | 1:100                | eBioscience                 | E15711-596  | Cat #15-0031-82  | Flow cytometry                                 |
| Anti-mouse CD4                                       | RM4-5                             | FITC                              | 1:200                | eBioscience                 | E00083-1631 | Cat #11-0042-85  | Flow cytometry                                 |
| Anti-mouse Ly6C (Gr-1)                               | HK1.4                             | Alexa Fluor 488                   | 1:300                | eBioscience                 | 4314544     | Cat #53-5932-82  | Flow cytometry                                 |
| Rat Anti-mouse/human CD115 (CSF-1R)                  | T38-320                           | PE                                | 1:100                | BD Pharmingen               | 7111867     | Cat #565249,     | Flow cytometry and Immunofluorescence analysis |
| DAPI (4',6-Diamidino-2-Phenylindol, Dihydrochloride) | Subcellular localization- nucleus | Emission range-456/460 nm         | 1:1000               | Invitrogen                  | WB3208041   | Cat# D1306       | Flow cytometry and Immunofluorescence analysis |
| Fluoroshield with DAPI F6057-20ml                    | Subcellular localization- nucleus | Emission range-456/460 nm         | Used directly-a drop | Sigma-Aldrich               | SLBS2101V   | Cat #1002339026  | Histology mounting medium                      |
| Fluoroshield F6182-20ml                              | Subcellular localization- nucleus | Emission range-456/460 nm         | Used directly-a drop | Sigma-Aldrich               | MKCC2089    | Cat #1002409107  | Histology mounting medium                      |
| Onecomp eBeads                                       | Compensation beads                | full spectrum cell analysis beads | 1 drop (50 µL)/test  | eBioscience                 | 4299596     | Cat # 01-1111-42 | Flow cytometry                                 |
| Onecomp eBeads                                       | Compensation beads                | full spectrum cell analysis beads | 1 drop (50 µL)/test  | Invitrogen                  | 19214193    | Cat # 01-1111-42 | Flow cytometry                                 |

| Target                                               | Clone name                    | Coupling                    | Dilution                 | Brand                               | Lot              | Reference        | Methods                                                       |
|------------------------------------------------------|-------------------------------|-----------------------------|--------------------------|-------------------------------------|------------------|------------------|---------------------------------------------------------------|
| BD calibrate Unlabeled Beads                         | set fluorescence compensation | Any fluorophore as per need | 1 drop (50 $\mu$ L)/test | BD                                  | -                | Cat# 340486      | Flow cytometry                                                |
| Rabbit polyclonal antibody to mCherry                | -                             | mCherry                     | 1:500                    | Abcam                               | GR32130 77-6     | Cat # ab 167453  | Western blot, Flow cytometry and Immunofluorescence analysis. |
| Mouse Anti-RNA mAb J2 (IgG2a)*                       | (IgG2a)                       | -                           | 1:500                    | English & Scientific consulting Kft | J2-1904          | Cat# 10010200    | Western blot, Flow cytometry and Immunofluorescence analysis  |
| Affinity purified Goat polyclonal anti- mouse LYVE-1 | LYVE-1                        | -                           | 1:200                    | R&D Systems                         | UBZ0418 121      | Cat# AF 2125     | Western blot and Immunofluorescence analysis                  |
| Purified Rat monoclonal anti mouse CCR2              | CD192                         | -                           | 1:200                    | R&D Systems                         | CDOA04 18101     | Cat# MAB55381    | Western blot, Flow cytometry and Immunofluorescence analysis  |
| Armenian Hamster-anti-CD3e <sup>+</sup>              | Monoclonal CD3e               | Primary antibody            | 1:500                    | BioXCell                            | Received as gift | Received as gift | Histology & Immunofluorescence analysis                       |
| Rat-anti-CD31/PECA M-1 <sup>+</sup>                  | Monoclonal EPR1725 9          | Primary antibody            | 1:300                    | Home-made                           | Received as gift | Received as gift | Histology & Immunofluorescence analysis                       |
| Rabbit -anti mouse - Lyve1 <sup>+</sup>              | Monoclonal RM103              | Primary antibody            | 1:250                    | RELIA Tech                          | Received as gift | Received as gift | Histology & Immunofluorescence analysis                       |
| Syrian-Hamster-anti mouse - gp38 <sup>+</sup>        | Monoclonal 8.1.1              | Primary antibody            | 1:500                    | BioXCell                            | Received as gift | Received as gift | Histology & Immunofluorescence analysis                       |
| Armenian-hamster anti-CD11c <sup>+</sup>             | Monoclonal N418               | Primary antibody            | 1:100                    | Home-made                           | Received as gift | Received as gift | Histology & Immunofluorescence analysis                       |
| Rabbit - anti-Laminin <sup>+</sup>                   | Monoclonal A5                 | Primary antibody            | 1:300                    | Sigma-Aldrich                       | Received as gift | Received as gift | Histology & Immunofluorescence analysis                       |
| Rat -anti mouse-CD11b <sup>+</sup>                   | Monoclonal M1/70              | Primary antibody            | 1:250                    | Home-made                           | Received as gift | Received as gift | Histology & Immunofluorescence analysis                       |
| Rat -anti mouse-CD169 <sup>+</sup>                   | Monoclonal 5F 1.1             | Primary antibody            | 1:200                    | Thermo Fisher                       | Received as gift | Received as gift | Histology & Immunofluorescence analysis                       |
| Rat-a-CD45pan <sup>+</sup>                           | Monoclonal 2D1                | Primary antibody            | 1:500                    | Home-made                           | Received as gift | Received as gift | Histology & Immunofluorescence analysis                       |

| Target                                   | Clone name                       | Coupling         | Dilution | Brand             | Lot              | Reference        | Methods                                 |
|------------------------------------------|----------------------------------|------------------|----------|-------------------|------------------|------------------|-----------------------------------------|
| Mouse-anti-CD45.2 Biotin                 | Monoclonal (AL-1) <sup>+</sup>   | Primary antibody | 1:500    | Home-made         | Received as gift | Received as gift | Histology & Immunofluorescence analysis |
| Mouse anti-NIMP-R14 <sup>+</sup>         | Monoclonal NIMP-R14 <sup>+</sup> | Primary antibody | 1:500    | Adipogen          | Received as gift | Received as gift | Histology & Immunofluorescence analysis |
| Mouse anti-LYVE-1 <sup>+</sup>           | Monoclonal 11A9.1                | Primary antibody | 1:200    | R&D systems       | Received as gift | Received as gift | Histology & Immunofluorescence analysis |
| Goat anti-mouse–Collagen IV <sup>+</sup> | Monoclonal CB243                 | Primary antibody | 1:500    | Southern Biotech  | Received as gift | Received as gift | Histology & Immunofluorescence analysis |
| Rat- anti mouse-CD45R/B220 <sup>+</sup>  | RA3-6B2                          | Primary antibody | 1:1000   | Home-made         | Received as gift | Received as gift | Histology & Immunofluorescence analysis |
| Rat anti-mouse B220 <sup>+</sup>         | RA3-6B2                          | Primary antibody | 1:250    | Life Technologies | Received as gift | Received as gift | Histology & Immunofluorescence analysis |

\*200µg reconstitution with 0.25ml distilled H<sub>2</sub>O

<sup>+</sup> Antibody received as gift from collaborators

**Table S2. Antibodies used for *in vivo* mice depletion**

| <b>Target</b>                                                                 | <b>Clone name</b> | <b>Brand</b> | <b>Lot</b> | <b>Reference</b> | <b>Methods</b>                                                | <b>Isotype control suggested by manufacturer</b> |
|-------------------------------------------------------------------------------|-------------------|--------------|------------|------------------|---------------------------------------------------------------|--------------------------------------------------|
| Purified InVivoM Ab anti-mouse Ly6G                                           | 1A8               | BioXcell     | 626716O1   | Cat #BE0075-1    | Neutrophil Depletion                                          | IgG Isotype control: Rat IgG2a, BioXcell         |
| InVivoM Ab anti-mouse Ly6G/Ly 6C (Gr-1)                                       | RB6-8C5           | BioXcell     | 594416O1   | Cat #BE0075      | Simultaneous neutrophil and monocyte depletion                | IgG Isotype control: Rat IgG2b, BioXcell.        |
| InVivo MAb anti-mouse CSF1R (CD115)                                           | AFS989            | BioXcell     | 661317N1   | Cat #BE0213      | Macrophage and monocyte depletion                             | Isotype control: Rat IgG2a, BioXcell             |
| InVivoM Ab Rat IgG2a Isotype control, anti Trinitrophenol (Isotype Control A) | 2A3               | BioXcell     | 654817M2   | Cat #BE0089      | Neutrophil Depletion<br><br>Macrophage and monocyte depletion | -                                                |
| InVivoM Ab Rat IgG2ab Isotype control, anti KLH (Isotype Control B)           | LTF-2             | BioXcell     | 629817F1   | Cat #BE0090      | Simultaneous neutrophil and monocyte depletion                | -                                                |
